# Supplementary material for: N/O co-doped edamame shell derived porous carbon materials for high-performance supercapacitors
Source: Royal Society of Chemistry journal article supplement (doi:10.1039/d4nj04272g), 2024-01-01
Supplement: d4nj04272g1.pdf [file d4nj04272g1.pdf]

The mass ratio capacitance  $C_m(\text{F}\cdot\text{g}^{-1})$  can be calculated by Equation (2-1):

$$C_m = \frac{I \times \Delta t}{m \times \Delta v} \#(S1)$$

Equation (2-2) is the basic expression for calculating the energy density  $E_s(\text{Wh}\cdot\text{kg}^{-1})$  in the symmetric two-electrode system:

$$E_s = \frac{C_m \times \Delta V^2}{2 \times 3.6} \#(S2)$$

The power density  $P_s(\text{W}\cdot\text{kg}^{-1})$  in the two-electrode test was calculated by equation (2-3):

$$P_s = \frac{3600 \times E_s}{\Delta t} \#(S3)$$

The contributions of surface-controlled and diffusion-controlled processes to the total charge storage are distinguished by equation (2-4):

$$I = k_1 V + k_2 V^{1/2} \quad (S4)$$

where  $V$  is the scanning rate in  $\text{mV}\cdot\text{s}^{-1}$ ;  $I$  is the peak current in the CV curve in  $\text{A}\cdot\text{g}^{-1}$ ; and  $k_1$  and  $k_2$  are constants.  $k_1 V$  is the diffusion-controlled process contribution and  $k_2 V^{1/2}$  is the surface-controlled process contribution.

Table S1 Electrochemical properties of some plant-derived carbon materials

| Material          | Activator | Specific capacitance ( $\text{F}\cdot\text{g}^{-1}$ ) | Electrolyte                                                    | Energy density ( $\text{Wh}\cdot\text{kg}^{-1}$ ) | Power density ( $\text{W}\cdot\text{kg}^{-1}$ ) | Cycling stability      | Reference |
|-------------------|-----------|-------------------------------------------------------|----------------------------------------------------------------|---------------------------------------------------|-------------------------------------------------|------------------------|-----------|
| Soybean shells    | KOH       | 339<br>( $1 \text{ A}\cdot\text{g}^{-1}$ )            | $6 \text{ mol}\cdot\text{L}^{-1}$<br>KOH                       | 39.1                                              | 2495.5                                          | 80%<br>10000 cycles    | 44        |
| Cashew nut husk   | KOH       | 305.2<br>( $1 \text{ A}\cdot\text{g}^{-1}$ )          | $6 \text{ mol}\cdot\text{L}^{-1}$<br>KOH                       | 11.2                                              | 400                                             | 97.1%<br>4000 cycles   | 45        |
| Peanut shell      | KOH       | 575.7<br>( $0.5 \text{ A}\cdot\text{g}^{-1}$ )        | $6 \text{ mol}\cdot\text{L}^{-1}$<br>KOH                       | 22.2                                              | 319.97                                          | 93.8%<br>10000 cycles  | 46        |
| Mung bean husk    | KOH       | 353<br>( $1 \text{ A}\cdot\text{g}^{-1}$ )            | $6 \text{ mol}\cdot\text{L}^{-1}$<br>KOH                       | 20.4                                              | 872                                             | 97.4%<br>10000 cycles  | 47        |
| Willow catkin     | KOH       | 298<br>( $0.5 \text{ A}\cdot\text{g}^{-1}$ )          | $6 \text{ mol}\cdot\text{L}^{-1}$<br>KOH                       | 21.0                                              | 180                                             | 99.7%<br>10000 cycles  | 48        |
| Lotus stamen      | KOH       | 322.8<br>( $0.5 \text{ A}\cdot\text{g}^{-1}$ )        | $3 \text{ mol}\cdot\text{L}^{-1}$<br>KOH                       | 24.1                                              | 490                                             | 90.2%<br>10000 cycles  | 49        |
| Sword bean shells | KOH       | 369<br>( $1 \text{ A}\cdot\text{g}^{-1}$ )            | $6 \text{ mol}\cdot\text{L}^{-1}$<br>KOH                       | 12                                                | 375                                             | 95.7%<br>10000 cycles  | 50        |
| Soybean dregs     | KOH       | 246.2<br>( $0.5 \text{ A}\cdot\text{g}^{-1}$ )        | $1 \text{ mol}\cdot\text{L}^{-1}$<br>$\text{Et}_4\text{NBF}_4$ | 44.27                                             | 2656                                            | 92.72%<br>10000 cycles | 51        |
| Eucalyptus bark   | KOH       | 483.5<br>( $0.5 \text{ A}\cdot\text{g}^{-1}$ )        | $1 \text{ mol}\cdot\text{L}^{-1}$<br>$\text{Na}_2\text{SO}_4$  | 21.7                                              | 168.9                                           | 83.1%<br>10000 cycles  | 52        |
| Mung bean sprouts | KOH       | 370<br>( $0.5 \text{ A}\cdot\text{g}^{-1}$ )          | $6 \text{ mol}\cdot\text{L}^{-1}$<br>KOH                       | 14.15                                             | 50                                              | 94.2%<br>5000 cycles   | 53        |
| Edamame shell     | KOH       | 301<br>( $0.5 \text{ A}\cdot\text{g}^{-1}$ )          | $6 \text{ mol}\cdot\text{L}^{-1}$<br>KOH                       | 37.6                                              | 200                                             | 96.68%<br>12000 cycles | This work |
